# Supplementary material for: Geomorphological evidence of large vertebrates interacting with the seafloor at abyssal depths in a region designated for deep-sea mining
Source: R Soc Open Sci. 2018 Aug 22;5(8):180286. doi: 10.1098/rsos.180286 (PMC6124127; doi:10.1098/rsos.180286)
Supplement: LMarsh_Track_Distance_ESM [file rsos180286supp1.xls]

## Sheet: M79_alltracks
MISSION	SAMPLE	TOTAL_NO	DISTANCE	AV_DISTANCE
M79	1		12.6469
M79	1		10.9059
M79	1		8.41232
M79	1		8.02863
M79	1	5	9.35176	9.8691
M79	2		19.3611
M79	2		8.83948
M79	2		2.87867
M79	2		7.58229
M79	2		7.04314
M79	2		7.96048
M79	2		11.1413
M79	2		11.4259
M79	2		11.0119
M79	2	10	10.6895	9.79339
M79	3		6.74365
M79	3		7.8059
M79	3		11.7733
M79	3	4	10.5722	9.22374
M79	4		6.44803
M79	4		5.38949
M79	4		6.53637
M79	4		5.52869
M79	4		5.92668
M79	4		6.59532
M79	4		5.63909
M79	4		7.23988
M79	4	9	9.91434	6.57977
M79	5		6.24472
M79	5		8.90895
M79	5		11.5072
M79	5		6.62352
M79	5		7.8059
M79	5		5.15008
M79	5		7.98027
M79	5		9.05737
M79	5		5.67962
M79	5	10	5.93635	7.4894
M79	6		13.1732
M79	6		9.33181
M79	6		10.1445
M79	6		10.7763
M79	6		9.0193
M79	6		7.66691
M79	6		4.55945
M79	6	8	6.10776	8.84741
M79	7		13.0486
M79	7		12.081
M79	7		13.0431
M79	7		8.51565
M79	7		12.1697
M79	7		12.8794
M79	7	7	13.5731	12.1872
M79	8		14.6931
M79	8		8.74818
M79	8		7.12007
M79	8	4	10.4453	10.2516
M79	9		8.14564
M79	9		5.81927
M79	9		5.83894
M79	9		4.95717
M79	9		4.5563
M79	9		3.6239
M79	9		6.57573
M79	9		6.58662
M79	9		7.40629
M79	9		2.71463
M79	9	11	3.36118	5.41688
M79	10		8.68073
M79	10		6.32229
M79	10		5.77971
M79	10		6.67312
M79	10		4.23334
M79	10		4.91068
M79	10	7	7.98745	6.36962
M79	11		11.0956
M79	11		10.5318
M79	11		10.129
M79	11		2.04782
M79	11		13.0687
M79	11		10.1608
M79	11		11.0607
M79	11	8	11.8185	9.98913
M79	12		12.2849
M79	12		12.321
M79	12		8.34323
M79	12		12.3817
M79	12	5	4.09564	9.88529
M79	13		6.16384
M79	13		6.16384
M79	13		6.32229
M79	13	4	7.00026	6.41256
M79	14		8.63695
M79	14		9.46604
M79	14		5.90396
M79	14		4.955
M79	14		5.03127
M79	14		7.31095
M79	14		6.6935
M79	14	8	5.88495	6.73533
M79	15		5.08882
M79	15		8.25773
M79	15		4.86834
M79	15		7.00743
M79	15		7.19668
M79	15		7.00743
M79	15		7.50747
M79	15		5.44194
M79	15		6.77665
M79	15		8.236
M79	15	11	9.37329	6.97834
M79	16		8.70927
M79	16		3.81588
M79	16		9.99105
M79	16		11.6031
M79	16		10.215
M79	16		6.64648
M79	16		5.88115
M79	16	8	7.28947	8.01893
M79	17		10.1622
M79	17		9.79404
M79	17		9.71135
M79	17		8.5614
M79	17		7.19045
M79	17		7.00743
M79	17		11.2263
M79	17		14.4834
M79	17		13.3283
M79	17		6.52058
M79	17		7.48955
M79	17	12	8.143	9.46817
M79	18		9.04985
M79	18		8.781
M79	18		8.26586
M79	18	4	7.45657
M79	19		10.697
M79	19		8.08779
M79	19		8.50891
M79	19		7.24631
M79	19		5.75797
M79	19		7.92551
M79	19		7.40532
M79	19		12.2493
M79	19	9	9.3709	8.52326
M79	20		6.36763
M79	20		5.81218
M79	20		6.22891
M79	20		5.53986
M79	20		5.34224
M79	20		5.08882
M79	20		6.05383
M79	20	8	5.82373	5.78215
M79	21		7.93399
M79	21		14.7409
M79	21		13.1711
M79	21		6.75347
M79	21	5	10.7472	10.6693
M79	22		14.158
M79	22		11.4476
M79	22		8.54307
M79	22	4	10.1776	11.0816
M79	23		10.526
M79	23		9.52502
M79	23		9.51325
M79	23	4	11.0067	10.1428
M79	24		7.18734
M79	24		9.56257
M79	24	3	5.29591	7.34861
M79	25		8.70155
M79	25		9.62096
M79	25		7.58761
M79	25		7.00743
M79	25	5	5.35898	7.65531
M79	26		6.52058
M79	26		5.69538
M79	26		6.53774
M79	26		6.02415
M79	26		7.41137
M79	26		7.87732
M79	26		6.99783
M79	26		6.29332
M79	26		6.98501
M79	26		7.39321
M79	26	11	8.33065	6.91514
M79	27		12.1464
M79	27		9.33497
M79	27		9.05975
M79	27		9.00021
M79	27	5	8.13198	9.53467
M79	28		15.2635
M79	28		8.63695
M79	28		8.04613
M79	28	4	7.97061	9.97931
M79	29		5.85442
M79	29		6.6935
M79	29		6.45151
M79	29		4.23334
M79	29		3.81001
M79	29		3.99373
M79	29		3.90295
M79	29	8	2.84769	4.72339
M79	30		15.1235
M79	30		13.6275
M79	30		10.0559
M79	30		11.2204
M79	30		11.1362
M79	30		9.60931
M79	30		9.47787
M79	30	8	8.90261	11.1441
M79	31		13.293
M79	31		7.90287
M79	31		6.91086
M79	31		5.71893
M79	31		11.0006
M79	31		9.28444
M79	31		7.19045
M79	31		6.26835
M79	31	9	8.90261	8.49689
		23

## Sheet: M79_>5
MISSION	SAMPLE	TOTAL_NO	DISTANCE	AV_DISTANCE
M79	1		12.6469
M79	1		10.9059
M79	1		8.41232
M79	1		8.02863
M79	1	5	9.35176	9.8691
M79	2		19.3611
M79	2		8.83948
M79	2		2.87867
M79	2		7.58229
M79	2		7.04314
M79	2		7.96048
M79	2		11.1413
M79	2		11.4259
M79	2		11.0119
M79	2	10	10.6895	9.79339
M79	4		6.44803
M79	4		5.38949
M79	4		6.53637
M79	4		5.52869
M79	4		5.92668
M79	4		6.59532
M79	4		5.63909
M79	4		7.23988
M79	4	9	9.91434	6.57977
M79	5		6.24472
M79	5		8.90895
M79	5		11.5072
M79	5		6.62352
M79	5		7.8059
M79	5		5.15008
M79	5		7.98027
M79	5		9.05737
M79	5		5.67962
M79	5	10	5.93635	7.4894
M79	6		13.1732
M79	6		9.33181
M79	6		10.1445
M79	6		10.7763
M79	6		9.0193
M79	6		7.66691
M79	6		4.55945
M79	6	8	6.10776	8.84741
M79	7		13.0486
M79	7		12.081
M79	7		13.0431
M79	7		8.51565
M79	7		12.1697
M79	7		12.8794
M79	7	7	13.5731	12.1872
M79	9		8.14564
M79	9		5.81927
M79	9		5.83894
M79	9		4.95717
M79	9		4.5563
M79	9		3.6239
M79	9		6.57573
M79	9		6.58662
M79	9		7.40629
M79	9		2.71463
M79	9	11	3.36118	5.41688
M79	10		8.68073
M79	10		6.32229
M79	10		5.77971
M79	10		6.67312
M79	10		4.23334
M79	10		4.91068
M79	10	7	7.98745	6.36962
M79	11		11.0956
M79	11		10.5318
M79	11		10.129
M79	11		2.04782
M79	11		13.0687
M79	11		10.1608
M79	11		11.0607
M79	11	8	11.8185	9.98913
M79	12		12.2849
M79	12		12.321
M79	12		8.34323
M79	12		12.3817
M79	12	5	4.09564	9.88529
M79	14		8.63695
M79	14		9.46604
M79	14		5.90396
M79	14		4.955
M79	14		5.03127
M79	14		7.31095
M79	14		6.6935
M79	14	8	5.88495	6.73533
M79	15		5.08882
M79	15		8.25773
M79	15		4.86834
M79	15		7.00743
M79	15		7.19668
M79	15		7.00743
M79	15		7.50747
M79	15		5.44194
M79	15		6.77665
M79	15		8.236
M79	15	11	9.37329	6.97834
M79	16		8.70927
M79	16		3.81588
M79	16		9.99105
M79	16		11.6031
M79	16		10.215
M79	16		6.64648
M79	16		5.88115
M79	16	8	7.28947	8.01893
M79	17		10.1622
M79	17		9.79404
M79	17		9.71135
M79	17		8.5614
M79	17		7.19045
M79	17		7.00743
M79	17		11.2263
M79	17		14.4834
M79	17		13.3283
M79	17		6.52058
M79	17		7.48955
M79	17	12	8.143	9.46817
M79	19		10.697
M79	19		8.08779
M79	19		8.50891
M79	19		7.24631
M79	19		5.75797
M79	19		7.92551
M79	19		7.40532
M79	19		12.2493
M79	19	9	9.3709	8.52326
M79	20		6.36763
M79	20		5.81218
M79	20		6.22891
M79	20		5.53986
M79	20		5.34224
M79	20		5.08882
M79	20		6.05383
M79	20	8	5.82373	5.78215
M79	21		7.93399
M79	21		14.7409
M79	21		13.1711
M79	21		6.75347
M79	21	5	10.7472	10.6693
M79	25		8.70155
M79	25		9.62096
M79	25		7.58761
M79	25		7.00743
M79	25	5	5.35898	7.65531
M79	26		6.52058
M79	26		5.69538
M79	26		6.53774
M79	26		6.02415
M79	26		7.41137
M79	26		7.87732
M79	26		6.99783
M79	26		6.29332
M79	26		6.98501
M79	26		7.39321
M79	26	11	8.33065	6.91514
M79	27		12.1464
M79	27		9.33497
M79	27		9.05975
M79	27		9.00021
M79	27	5	8.13198	9.53467
M79	29		5.85442
M79	29		6.6935
M79	29		6.45151
M79	29		4.23334
M79	29		3.81001
M79	29		3.99373
M79	29		3.90295
M79	29	8	2.84769	4.72339
M79	30		15.1235
M79	30		13.6275
M79	30		10.0559
M79	30		11.2204
M79	30		11.1362
M79	30		9.60931
M79	30		9.47787
M79	30	8	8.90261	11.1441
M79	31		13.293
M79	31		7.90287
M79	31		6.91086
M79	31		5.71893
M79	31		11.0006
M79	31		9.28444
M79	31		7.19045
M79	31		6.26835
M79	31	9	8.90261	8.49689
	Total number	23
	AVERAGE		8.13737
	STD.DEV		2.82584

## Sheet: M81_alltracks
MISSION	SAMPLE	TOTAL_NO	DISTANCE	AV_DISTANCE
M81	1		6.17602
M81	1		9.25084
M81	1		9.16769
M81	1		8.49213
M81	1		9.80041
M81	1		7.05064
M81	1		8.58563
M81	1		8.90019
M81	1		9.89349
M81	1		8.68455
M81	1		8.67254
M81	1		6.81259
M81	1		7.42899
M81	1		7.54818
M81	1		9.45124
M81	1		8.63602
M81	1	17	6.61408	8.30384
M81	2		9.96922
M81	2		11.4933
M81	2		9.90028
M81	2		6.87922
M81	2		8.3658
M81	2		10.4964
M81	2		10.0462
M81	2		6.89581
M81	2		6.52577
M81	2		8.01381
M81	2		12.032
M81	2	12	17.0995	9.80977
M81	3		6.37509
M81	3		6.84153
M81	3		6.92858
M81	3		5.98724
M81	3		12.6084
M81	3	6	12.806	8.59114
M81	4		6.85825
M81	4		7.70048
M81	4		7.96145
M81	4		7.59871
M81	4		7.39097
M81	4		5.9626
M81	4	7	9.78728	7.60854
M81	5		9.6227
M81	5		9.49151
M81	5		7.26845
M81	5		9.10596
M81	5		6.32342
M81	5		8.75124
M81	5		8.43123
M81	5		6.91807
M81	5		6.12555
M81	5	10	7.92843	7.99666
M81	6		14.3172
M81	6		12.2132
M81	6		9.11808
M81	6		8.75248
M81	6		9.69091
M81	6		5.59049
M81	6		8.6559
M81	6		7.1151
M81	6	9	9.82208	9.47505
M81	7		14.1318
M81	7		8.59729
M81	7		9.88228
M81	7		12.7574
M81	7		7.50142
M81	7		13.0634
M81	7		12.619
M81	7	8	9.43427	10.9984
M81	8		7.6811
M81	8		8.08013
M81	8		8.5484
M81	8		8.6494
M81	8		8.48509
M81	8		6.73368
M81	8		4.43242
M81	8		8.07641
M81	8		8.13552
M81	8		7.59876
M81	8		9.36748
M81	8		8.65977
M81	8		9.95994
M81	8		9.53358
M81	8	15	10.0029	8.26297
M81	9		6.27306
M81	9		4.95551
M81	9		5.99976
M81	9		6.16228
M81	9		7.1268
M81	9		6.47971
M81	9		7.19788
M81	9		7.34206
M81	9		7.41693
M81	9		5.16269
M81	9		8.77299
M81	9		10.5917
M81	9		11.3135
M81	9	14	9.21256	7.4291
M81	10		4.12143
M81	10		6.77003
M81	10		6.22933
M81	10		5.33677
M81	10		6.36882
M81	10		7.85163
M81	10		9.65803
M81	10		7.056
M81	10		7.39049
M81	10		6.88797
M81	10		9.94929
M81	10		11.4192
M81	10		6.82925
M81	10	14	9.156	7.50173
M81	11		10.5827
M81	11		9.38767
M81	11		8.01333
M81	11		7.66394
M81	11		14.9663
M81	11		7.81872
M81	11	7	7.35127	9.39771
M81	12		8.13481
M81	12		6.00434
M81	12		5.60056
M81	12		9.52637
M81	12		7.27863
M81	12		7.24571
M81	12	7	9.77901	7.65277
M81	13		10.0966
M81	13		11.1499
M81	13		12.8289
M81	13		9.22558
M81	13		8.68084
M81	13		7.74958
M81	13		8.09363
M81	13		8.75214
M81	13	9	8.84452	9.4913
M81	14		4.774
M81	14		8.8906
M81	14		6.05429
M81	14		4.96771
M81	14		10.7765
M81	14		2.91414
M81	14		12.4105
M81	14		11.0754
M81	14	9	8.45968	7.81364
M81	15		9.27782
M81	15		4.35235
M81	15		10.315
M81	15		11.6344
M81	15		9.71347
M81	15		9.14782
M81	15		12.4189
M81	15		12.6648
M81	15		10.5067
M81	15		9.88015
M81	15		6.75122
M81	15		7.45132
M81	15		9.65727
M81	15	14	12.2156	9.71334
M81	16		7.27891
M81	16		7.05099
M81	16		9.30518
M81	16		9.05615
M81	16		7.45135
M81	16		6.86849
M81	16		13.032
M81	16		6.02406
M81	16		7.58649
M81	16		7.83128
M81	16		7.0252
M81	16		6.55489
M81	16		6.1963
M81	16		13.5668
M81	16		11.8568
M81	16		5.88387
M81	16		4.81925
M81	16		5.66389
M81	16		6.62646
M81	16		5.68308
M81	16	21	8.56179	7.80587
M81	17		5.68231
M81	17		7.04259
M81	17		7.13649
M81	17		3.69429
M81	17	5	10.5914	6.82942
M81	18		8.59664
M81	18		7.26242
M81	18		5.83245
M81	18		6.727
M81	18		6.36956
M81	18		7.62712
M81	18		10.847
M81	18		7.28386
M81	18		5.70804
M81	18		6.49569
M81	18		8.30488
M81	18		6.48126
M81	18		6.87385
M81	18		3.36118
M81	18		7.61073
M81	18		8.30488
M81	18		7.49503
M81	18		7.74889
M81	18		6.17045
M81	18		6.40376
M81	18		8.0103
M81	18	22	9.0079	7.20558
M81	19		13.5753
M81	19		11.0885
M81	19		16.7347
M81	19		10.7103
M81	19		11.7903
M81	19		9.51592
M81	19		7.75729
M81	19	8	11.5674	11.5925
M81	20		9.26161
M81	20		4.6269
M81	20		7.84068
M81	20		8.40174
M81	20	5	6.13262	7.25271
M81	21		18.6504
M81	21		20.5173
M81	21		7.87708
M81	21		23.1779
M81	21		19.03
M81	21		12.1216
M81	21	7	12.6066	16.283
M81	22		7.09017
M81	22		7.76932
M81	22		6.56525
M81	22		7.37703
M81	22	5	6.74243	7.10884
M81	23		4.99937
M81	23		7.38339
M81	23		7.60364
M81	23		5.86729
M81	23		6.64376
M81	23		8.67002
M81	23		7.9848
M81	23		7.43429
M81	23		5.63774
M81	23	10	7.14313	6.93674
M81	24		7.67626
M81	24		10.2149
M81	24		7.67625
M81	24		9.40373
M81	24		9.39
M81	24		10.4439
M81	24		10.5137
M81	24		11.149
M81	24		10.3778
M81	24		10.3695
M81	24		12.6423
M81	24		18.7914
M81	24		10.0322
M81	24		8.11209
M81	24		13.796
M81	24	16	18.0073	11.1623
M81	25		6.6365
M81	25		6.23965
M81	25		6.97614
M81	25		8.44373
M81	25		5.93997
M81	25	6	8.03015	7.04436
M81	26		9.69786
M81	26		11.1673
M81	26		7.06281
M81	26		7.19085
M81	26	5	17.956	10.615
M81	27		12.7735
M81	27		13.716
M81	27		5.80323
M81	27		6.90547
M81	27		8.10018
M81	27	6	8.95553	9.37566
M81	28		8.0362
M81	28		7.48723
M81	28		6.817
M81	28		8.82589
M81	28	5	8.21241	7.87574
M81	29		8.145
M81	29		8.67576
M81	29		5.60612
M81	29		6.40387
M81	29		7.27913
M81	29		6.82098
M81	29		8.63801
M81	29		12.6738
M81	29		13.0686
M81	29	10	10.8303	8.81415
M81	30		13.1156
M81	30		9.95183
M81	30		17.3434
M81	30		10.7756
M81	30		7.75622
M81	30		6.48324
M81	30		10.9282
M81	30	8	7.42395	10.4723
		30

## Sheet: M81>5
MISSION	SAMPLE	TOTAL_NO	DISTANCE	AV_DISTANCE
M81	1		6.17602
M81	1		9.25084
M81	1		9.16769
M81	1		8.49213
M81	1		9.80041
M81	1		7.05064
M81	1		8.58563
M81	1		8.90019
M81	1		9.89349
M81	1		8.68455
M81	1		8.67254
M81	1		6.81259
M81	1		7.42899
M81	1		7.54818
M81	1		9.45124
M81	1		8.63602
M81	1	17	6.61408	8.30384
M81	2		9.96922
M81	2		11.4933
M81	2		9.90028
M81	2		6.87922
M81	2		8.3658
M81	2		10.4964
M81	2		10.0462
M81	2		6.89581
M81	2		6.52577
M81	2		8.01381
M81	2		12.032
M81	2	12	17.0995	9.80977
M81	3		6.37509
M81	3		6.84153
M81	3		6.92858
M81	3		5.98724
M81	3		12.6084
M81	3	6	12.806	8.59114
M81	4		6.85825
M81	4		7.70048
M81	4		7.96145
M81	4		7.59871
M81	4		7.39097
M81	4		5.9626
M81	4	7	9.78728	7.60854
M81	5		9.6227
M81	5		9.49151
M81	5		7.26845
M81	5		9.10596
M81	5		6.32342
M81	5		8.75124
M81	5		8.43123
M81	5		6.91807
M81	5		6.12555
M81	5	10	7.92843	7.99666
M81	6		14.3172
M81	6		12.2132
M81	6		9.11808
M81	6		8.75248
M81	6		9.69091
M81	6		5.59049
M81	6		8.6559
M81	6		7.1151
M81	6	9	9.82208	9.47505
M81	7		14.1318
M81	7		8.59729
M81	7		9.88228
M81	7		12.7574
M81	7		7.50142
M81	7		13.0634
M81	7		12.619
M81	7	8	9.43427	10.9984
M81	8		7.6811
M81	8		8.08013
M81	8		8.5484
M81	8		8.6494
M81	8		8.48509
M81	8		6.73368
M81	8		4.43242
M81	8		8.07641
M81	8		8.13552
M81	8		7.59876
M81	8		9.36748
M81	8		8.65977
M81	8		9.95994
M81	8		9.53358
M81	8	15	10.0029	8.26297
M81	9		6.27306
M81	9		4.95551
M81	9		5.99976
M81	9		6.16228
M81	9		7.1268
M81	9		6.47971
M81	9		7.19788
M81	9		7.34206
M81	9		7.41693
M81	9		5.16269
M81	9		8.77299
M81	9		10.5917
M81	9		11.3135
M81	9	14	9.21256	7.4291
M81	10		4.12143
M81	10		6.77003
M81	10		6.22933
M81	10		5.33677
M81	10		6.36882
M81	10		7.85163
M81	10		9.65803
M81	10		7.056
M81	10		7.39049
M81	10		6.88797
M81	10		9.94929
M81	10		11.4192
M81	10		6.82925
M81	10	14	9.156	7.50173
M81	11		10.5827
M81	11		9.38767
M81	11		8.01333
M81	11		7.66394
M81	11		14.9663
M81	11		7.81872
M81	11	7	7.35127	9.39771
M81	12		8.13481
M81	12		6.00434
M81	12		5.60056
M81	12		9.52637
M81	12		7.27863
M81	12		7.24571
M81	12	7	9.77901	7.65277
M81	13		10.0966
M81	13		11.1499
M81	13		12.8289
M81	13		9.22558
M81	13		8.68084
M81	13		7.74958
M81	13		8.09363
M81	13		8.75214
M81	13	9	8.84452	9.4913
M81	14		4.774
M81	14		8.8906
M81	14		6.05429
M81	14		4.96771
M81	14		10.7765
M81	14		2.91414
M81	14		12.4105
M81	14		11.0754
M81	14	9	8.45968	7.81364
M81	15		9.27782
M81	15		4.35235
M81	15		10.315
M81	15		11.6344
M81	15		9.71347
M81	15		9.14782
M81	15		12.4189
M81	15		12.6648
M81	15		10.5067
M81	15		9.88015
M81	15		6.75122
M81	15		7.45132
M81	15		9.65727
M81	15	14	12.2156	9.71334
M81	16		7.27891
M81	16		7.05099
M81	16		9.30518
M81	16		9.05615
M81	16		7.45135
M81	16		6.86849
M81	16		13.032
M81	16		6.02406
M81	16		7.58649
M81	16		7.83128
M81	16		7.0252
M81	16		6.55489
M81	16		6.1963
M81	16		13.5668
M81	16		11.8568
M81	16		5.88387
M81	16		4.81925
M81	16		5.66389
M81	16		6.62646
M81	16		5.68308
M81	16	21	8.56179	7.80587
M81	17		5.68231
M81	17		7.04259
M81	17		7.13649
M81	17		3.69429
M81	17	5	10.5914	6.82942
M81	18		8.59664
M81	18		7.26242
M81	18		5.83245
M81	18		6.727
M81	18		6.36956
M81	18		7.62712
M81	18		10.847
M81	18		7.28386
M81	18		5.70804
M81	18		6.49569
M81	18		8.30488
M81	18		6.48126
M81	18		6.87385
M81	18		3.36118
M81	18		7.61073
M81	18		8.30488
M81	18		7.49503
M81	18		7.74889
M81	18		6.17045
M81	18		6.40376
M81	18		8.0103
M81	18	22	9.0079	7.20558
M81	19		13.5753
M81	19		11.0885
M81	19		16.7347
M81	19		10.7103
M81	19		11.7903
M81	19		9.51592
M81	19		7.75729
M81	19	8	11.5674	11.5925
M81	20		9.26161
M81	20		4.6269
M81	20		7.84068
M81	20		8.40174
M81	20	5	6.13262	7.25271
M81	21		18.6504
M81	21		20.5173
M81	21		7.87708
M81	21		23.1779
M81	21		19.03
M81	21		12.1216
M81	21	7	12.6066	16.283
M81	22		7.09017
M81	22		7.76932
M81	22		6.56525
M81	22		7.37703
M81	22	5	6.74243	7.10884
M81	23		4.99937
M81	23		7.38339
M81	23		7.60364
M81	23		5.86729
M81	23		6.64376
M81	23		8.67002
M81	23		7.9848
M81	23		7.43429
M81	23		5.63774
M81	23	10	7.14313	6.93674
M81	24		7.67626
M81	24		10.2149
M81	24		7.67625
M81	24		9.40373
M81	24		9.39
M81	24		10.4439
M81	24		10.5137
M81	24		11.149
M81	24		10.3778
M81	24		10.3695
M81	24		12.6423
M81	24		18.7914
M81	24		10.0322
M81	24		8.11209
M81	24		13.796
M81	24	16	18.0073	11.1623
M81	25		6.6365
M81	25		6.23965
M81	25		6.97614
M81	25		8.44373
M81	25		5.93997
M81	25	6	8.03015	7.04436
M81	26		9.69786
M81	26		11.1673
M81	26		7.06281
M81	26		7.19085
M81	26	5	17.956	10.615
M81	27		12.7735
M81	27		13.716
M81	27		5.80323
M81	27		6.90547
M81	27		8.10018
M81	27	6	8.95553	9.37566
M81	28		8.0362
M81	28		7.48723
M81	28		6.817
M81	28		8.82589
M81	28	5	8.21241	7.87574
M81	29		8.145
M81	29		8.67576
M81	29		5.60612
M81	29		6.40387
M81	29		7.27913
M81	29		6.82098
M81	29		8.63801
M81	29		12.6738
M81	29		13.0686
M81	29	10	10.8303	8.81415
M81	30		13.1156
M81	30		9.95183
M81	30		17.3434
M81	30		10.7756
M81	30		7.75622
M81	30		6.48324
M81	30		10.9282
M81	30	8	7.42395	10.4723
	Total number	30
	AVERAGE		8.77763
	STD.DEV		2.88381

## Sheet: M83_alltracks
MISSION	SAMPLE	TOTAL_NO	DISTANCE	AV_DISTANCE
M83	1		13.5087
M83	1		13.0353
M83	1		11.6449
M83	1		13.8498
M83	1	5	14.9045
	Total number	1
	AVERAGE		13.3886
	STD.DEV		1.19272

## Sheet: M85_alltracks
MISSION	SAMPLE	TOTAL_NO	DISTANCE	AV_DISTANCE
M85	1		7.35078
M85	1		5.1942
M85	1		4.44414
M85	1		5.62806
M85	1	5	6.28496	5.78043
M85	2		6.06161
M85	2		7.49636
M85	2		5.84248
M85	2		7.55084
M85	2	5	8.55065	7.10039
	Total number	2
	AVERAGE		6.44041
	STD.DEV		1.26285

## Sheet: Roman et al
MISSION	SAMPLE	TOTAL_NO	DISTANCE	AV_DISTANCE
Roman	1		8.01
Roman	1		10.12
Roman	1		6.05
Roman	1		7.48
Roman	1	5	8.77
	Total number	1
	AVERAGE		8.086
	STD.DEV		1.51024

## Sheet: Morphometrics
	sample	length_m	width_m
00093_test	1	2.81	0.82
00093_test	2	2.99	1.38
00093_test	3	3.4	0.97
00093_test	4	2.15	0.79
00093_test	5	2.46	1.55
00093_test	6	2.83	1.13
00093_test	7	1.17	0.74
00093_test	8	3.47	0.75
00093_test	9	1.85	0.59
		2.57	0.968889
